# Supplementary material for: Catalytic activity and X-ray photoelectron spectroscopy performance of Bi2MoxW(1−x)O6 solid-solutions
Source: Royal Society of Chemistry journal article supplement (doi:10.1039/c2cy00506a), 2012-01-01
Supplement: c2cy00506a.pdf [file c2cy00506a.pdf]

**Electronic Supporting Information**

**Catalytic activity and X-Ray photoelectron spectroscopy  
performance of  $\text{Bi}_2\text{Mo}_x\text{W}_{(1-x)}\text{O}_6$  solid-solutions**

R. Rangel, X. A. Trejo-Cruz

*Universidad Michoacana de S.N.H., Morelia, Mich., México.*

P. Bartolo-Pérez

*Cinvestav-IPN, Mérida, Yuc., México.*

E. Martínez

*<sup>c</sup>Centro de Investigación en Materiales Avanzados, S.C., Parque de Investigación e*

*Innovación Tecnológica (PIIT), Apodaca, Nuevo León, México.*

G. Díaz

*Instituto de Física-UNAM, A. P. 20-364, C. P. 01000, México, D. F.*

*México.*

D. H. Galván

*CNyN-UNAM, Km. 107 Carretera Tijuana-Ensenada, B.C.*

**Table S1.** Relative atomic concentrations for samples sintered at 700 °C.

|                                                          |        | Intensity |           |          |           | Atomic concentration (%) |           |          |           |
|----------------------------------------------------------|--------|-----------|-----------|----------|-----------|--------------------------|-----------|----------|-----------|
| Catalysts                                                | Name   | <b>O</b>  | <b>Bi</b> | <b>W</b> | <b>Mo</b> | <b>O</b>                 | <b>Bi</b> | <b>W</b> | <b>Mo</b> |
| $\text{Bi}_2\text{MoO}_6$                                | BiMo-7 | 3.94      | 12.37     | 0.0      | 4.31      | 66.7                     | 22.2      | 0.0      | 11.1      |
| $\text{Bi}_2\text{Mo}_{0.995}\text{W}_{0.005}\text{O}_6$ | M995-7 | 3.59      | 13.68     | 0.78     | 2.97      | 63.1                     | 26.8      | 2.2      | 7.9       |
| $\text{Bi}_2\text{Mo}_{0.95}\text{W}_{0.05}\text{O}_6$   | M95-7  | 5.07      | 15.11     | 0.36     | 3.82      | 68.6                     | 22.8      | 0.8      | 7.8       |
| $\text{Bi}_2\text{Mo}_{0.9}\text{W}_{0.1}\text{O}_6$     | M9-7   | 4.09      | 12.40     | 0.62     | 3.65      | 66.8                     | 22.5      | 1.6      | 9.0       |
| $\text{Bi}_2\text{Mo}_{0.75}\text{W}_{0.25}\text{O}_6$   | M75-7  | 4.07      | 12.19     | 1.22     | 2.74      | 67.4                     | 22.5      | 3.2      | 6.9       |
| $\text{Bi}_2\text{Mo}_{0.5}\text{W}_{0.5}\text{O}_6$     | M5-7   | 3.87      | 13.27     | 1.83     | 1.91      | 65.3                     | 24.9      | 4.9      | 4.9       |
| $\text{Bi}_2\text{Mo}_{0.1}\text{W}_{0.9}\text{O}_6$     | M1-7   | 3.40      | 11.57     | 3.15     | 0.0       | 65.6                     | 24.8      | 9.6      | 0.0       |
| $\text{Bi}_2\text{Mo}_{0.05}\text{W}_{0.95}\text{O}_6$   | M05-7  | 3.70      | 11.61     | 2.59     | 0.0       | 68.5                     | 23.9      | 7.6      | 0.0       |
| $\text{Bi}_2\text{WO}_6$                                 | BiW-7  | 3.74      | 10.61     | 3.92     | 0.0       | 66.7                     | 22.2      | 11.1     | 0.0       |

**Table S2.** Reative atomic concentrations for samples sintered at 900 °C.

|                                                        |        | Intensity |           |          |           | Atomic concentration (%) |           |          |           |
|--------------------------------------------------------|--------|-----------|-----------|----------|-----------|--------------------------|-----------|----------|-----------|
| Catalysts                                              | Name   | <b>O</b>  | <b>Bi</b> | <b>W</b> | <b>Mo</b> | <b>O</b>                 | <b>Bi</b> | <b>W</b> | <b>Mo</b> |
| $\text{Bi}_2\text{MoO}_6$                              | BiMo-9 | 2.98      | 12.56     | 0.0      | 2.52      | 66.7                     | 22.2      | 0.0      | 11.1      |
| $\text{Bi}_2\text{Mo}_{0.99}\text{W}_{0.01}\text{O}_6$ | M99-9  | 3.42      | 12.06     | 0.52     | 3.52      | 66.3                     | 18.5      | 1.8      | 13.4      |
| $\text{Bi}_2\text{Mo}_{0.75}\text{W}_{0.25}\text{O}_6$ | M75-9  | 3.27      | 12.51     | 1.07     | 2.51      | 66.2                     | 20.0      | 3.8      | 10        |
| $\text{Bi}_2\text{Mo}_{0.5}\text{W}_{0.5}\text{O}_6$   | M5-9   | 3.30      | 10.95     | 1.63     | 1.54      | 69.4                     | 18.2      | 6.1      | 6.4       |
| $\text{Bi}_2\text{Mo}_{0.1}\text{W}_{0.9}\text{O}_6$   | M1-9   | 2.63      | 7.05      | 2.31     | 0.0       | 73.1                     | 15.5      | 11.4     | 0.0       |
| $\text{Bi}_2\text{Mo}_{0.05}\text{W}_{0.95}\text{O}_6$ | M05-7  | 6.24      | 14.49     | 5.95     | 0.0       | 73.9                     | 13.6      | 12.5     | 0.0       |
| $\text{Bi}_2\text{WO}_6$                               | BiW-7  | 3.62      | 9.41      | 3.40     | 0.0       | 66.7                     | 22.2      | 11.1     | 0.0       |
